# Supplementary material
Source: PubMed Central journal article supplement (PMC3510314)

## **Supplemental Materials**

### **Dynamic interaction between TAL1 oncoprotein and LSD1 regulates TAL1 function in hematopoiesis and leukemogenesis**

#### **LSD1 siRNA sequences:**

LSD1 siRNA target sequence 1: CUAUAAAGCUCCAAUACUG; target sequence 2: GUAAAGCCACCCAGAGAU; target sequence 3: GACAAGCUGUCCUAAAGA; target sequence 4: UGAAUUAGCUGAAACACAA.

#### **Supplemental Figure legends:**

##### **Supplement Figure S1. Pre-TCR $\alpha$ is a TAL1 target in T cell acute lymphoblastic leukemia.**

**(A)** The effect of Ser172 phosphorylation on the LSD1 recruitment. The purified GST and GST-TAL1 fusion proteins were incubated with ATP in the presence or absence of the catalytic subunit of PKA. The reaction was further incubated with purified LSD1. The bound LSD1 was resolved in SDS-PAGE and visualized by Western blotting analysis (Top). Loading of GST fusion proteins were shown (Bottom). **(B)** Western blotting analysis of TAL1 mutant expression in control or TAL1 mutant overexpressed Jurkat cells. **(C)** Alignment of the mouse and human pre-TCR $\alpha$  enhancers.

##### **Supplemental Figure S2. PKA mediated phosphorylation controls LSD1 recruitment and transcription of the TAL1 target genes in T-ALL cells.**

**(A)** Jurkat cells were treated with PKA inhibitor H89 or PKA activator forskolin for 2 hrs. The nuclear extracts were prepared and precipitated TAL1 antibody. The immunoprecipitates were analyzed by WB with LSD1 (Top), HDAC1 (Middle), or phosphor-PKA (Bottom) antibodies. **(B)** Treatment of H89 or Forskolin doesn't affect the level of LSD1. Jurkat cells were treated with PKA inhibitor H89 or PKA

activator forskolin for 2 hrs. The nuclear extracts were prepared and analyzed by Western blotting using LSD1 antibody. **(C)** ChIP analysis of H3K4me2 enrichment at the *p21* enhancer from Jurkat cells transduced with wide type Flag-TAL1, Flag-TAL1<sup>Δ142-185</sup>, and Flag-TAL1<sup>S172A</sup>. **(D)** ChIP analysis of H3K4me2 enrichment at the *p21* enhancer using cross-linked chromatin from Jurkat cells treated with PKA inhibitor H89 and activator forskolin. **(E)** ChIP analysis of H3K4me2 enrichment at the *Runx1* promoter from Jurkat cells transduced with wide type Flag-TAL1, Flag-TAL1<sup>Δ142-185</sup>, and Flag-TAL1<sup>S172A</sup>. **(F)** ChIP analysis of enrichment of H3K4 methylation at the *p21* enhancer comparing the control and LSD1 KD Jurkat cells.

**Supplemental Figure S3. Knock down of TAL1 inhibits leukemic T cell colony formation and induces T cell apoptosis.** **(A)** A soft agar colony formation assay was carried out in Jurkat cells stably expressed Dox-inducible TAL1 shRNA in the absence or presence of Doxycycline. **(B)** The FITC annexin V staining of apoptosis cells was analyzed from WT control and Jurkat cells stably expressed Dox-inducible TAL1 shRNA in the absence or presence Doxycycline for 72 or 96 hours. Pink: Total cells; Green: live cells; and Blue: Apoptotic cells. **(C)** Total RNA from Dox treated Jurkat cells for 0, 72, and 96 hrs was isolated and analyzed for the expression levels of *STIL* and *actin* by RT-PCR. **(D and E)** ChIP analysis of H3K4me1 **(D)** and H3K4me2 **(E)** in the inducible TAL1 KD Jurkat cells treated with or without doxycycline.

**Supplemental Figure S4. PKA inhibitor H89 blocks EPO-induced erythroid differentiation.** **(A)** CD34+ cells were treated with 5 μM of H89 and differentiated with erythroid differentiation medium (including EPO) for 7 days. The cells were analyzed for CD34 or CD36 positive population by FACS analysis. **(B)** Total RNA from CD34+ cells and CD36+ cells treated with or

without 5  $\mu$ M of H89 was isolated and analyzed for the expression levels of *p4.2* and *actin* by RT-PCR.

A

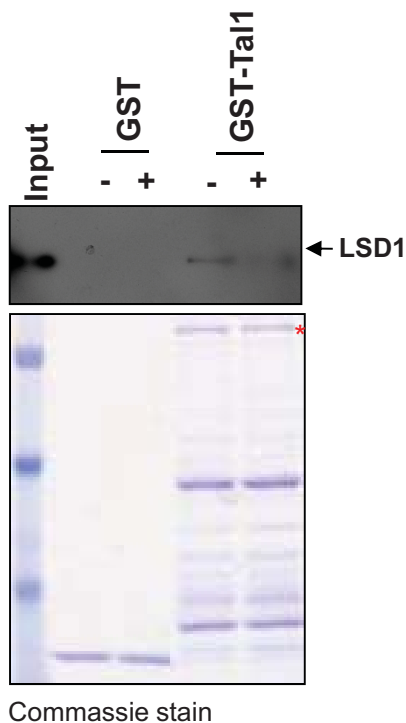

B

Alignment of mouse\_pTa (upper line) and human\_pTa (lower line)  
Identity=70.43%

```

                                E1
mouse_pTa.txt  CCCCTGTCCCATCTGCACTGTGGTTCGAGAGCCTGGGCCA
human_pTa.txt  CTCTTTCCCATCTGTAATGTGGTAACCGAGCCCGAGCCA
Consensus     c c t  cccatctg a tgttgt  c gagcc g gcca

mouse_pTa.txt  GCACTTCCCCCAGACTGGAGAATGACAGGCAGAGTCGTTAG
human_pTa.txt  GCTCTCCCTGGGCTGGAGGGT....GGGAGAGTCGTTAG
Consensus     gc c tccc g ctggag  t   gg agagtcgttag

                                E2
mouse_pTa.txt  GGACACCTGCCTCCCTCCTCCCACTCCAGGGCGGGAAGC
human_pTa.txt  GGACACCTGCCTCCCTCCTCCCACTCCAGGGCGGGAACC
Consensus     ggacacctgcc c c  cctccc ctcc ggg gggaa c

                                E3
mouse_pTa.txt  CACCATGCTG.....CACCTGGGCTG...CAGGGCCTGGG
human_pTa.txt  CACCGCGACGGCGCGCACCTGGGCGGGCTGTGCCTGGG
Consensus     cacc g g  cacctgggc g  c g gcctggg

                                E4
mouse_pTa.txt  AACACGTGGAGCCCACAGTACCAAGCCCTCCCCCGC
human_pTa.txt  AACGCGCGGGGACCGCGGCTCCAGGCAGCCCTGGGA..
Consensus     aac cg gg g cc c g  cca  cc
```

C

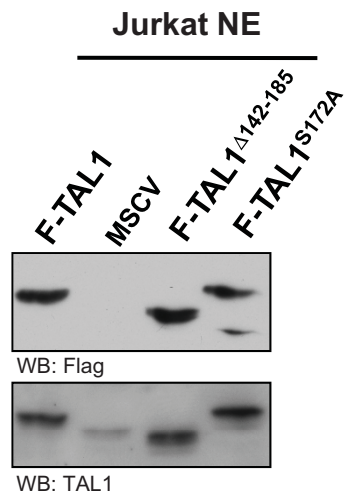

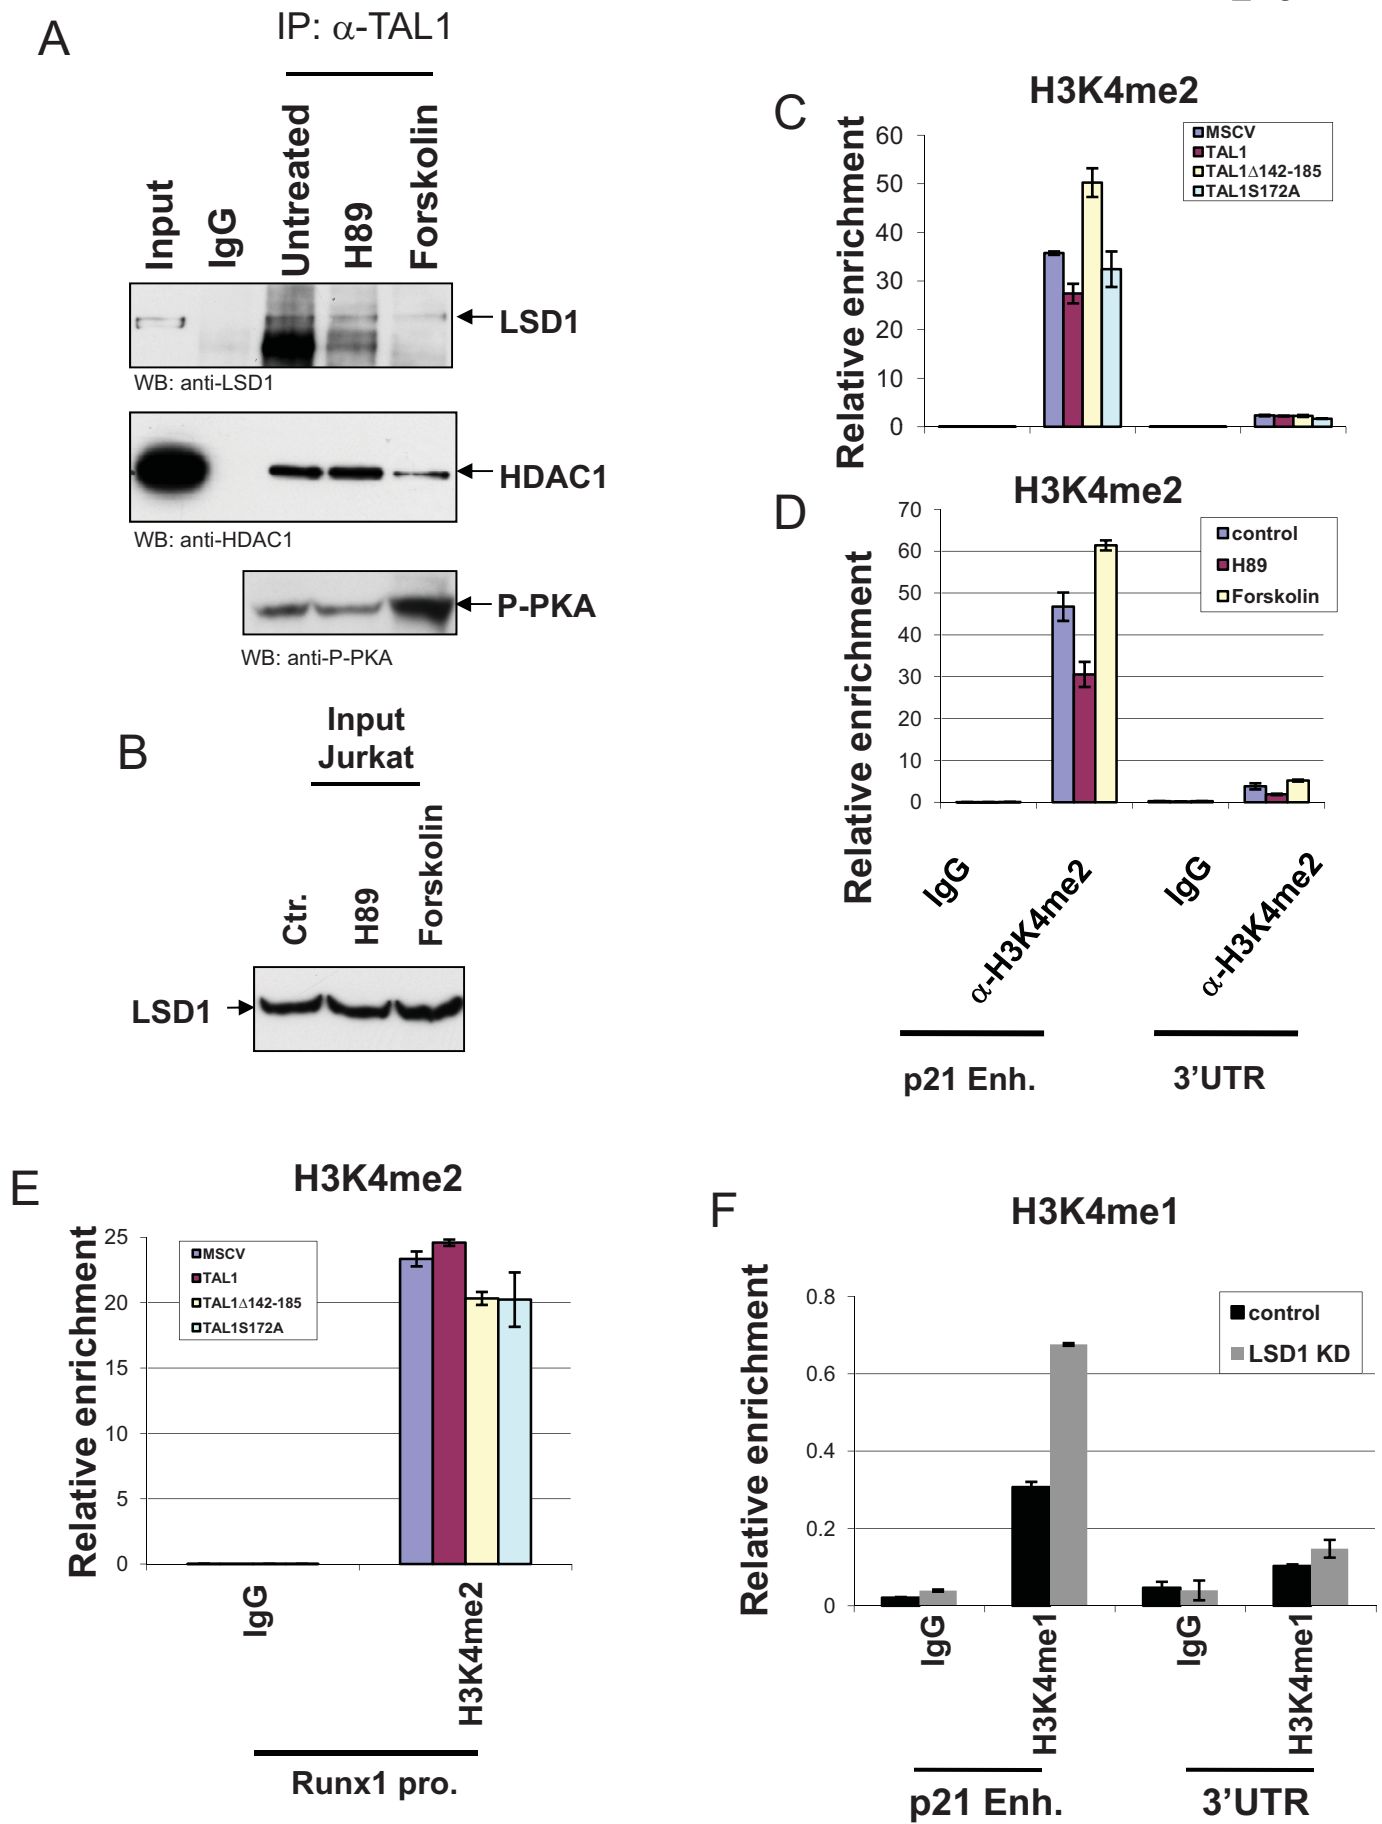

A

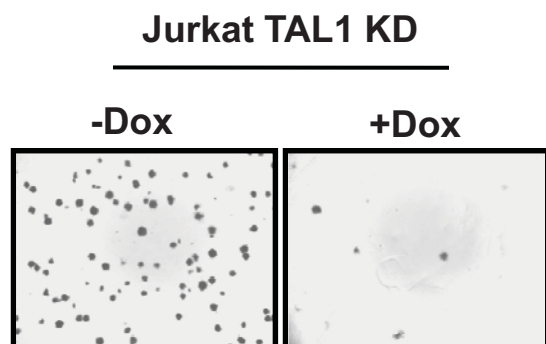

B

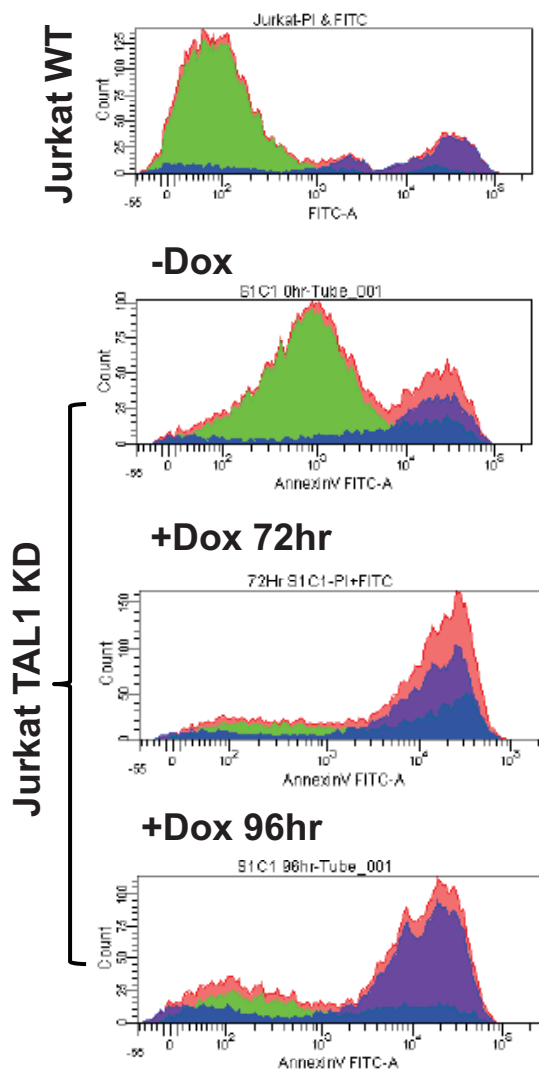

C

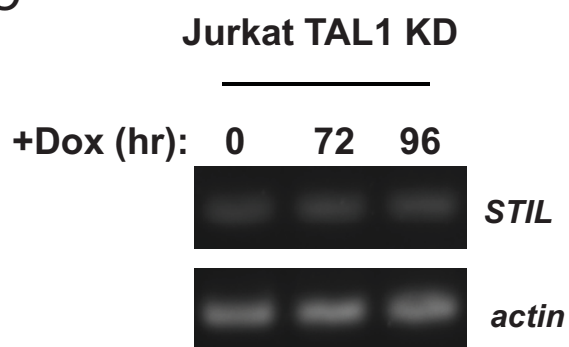

D

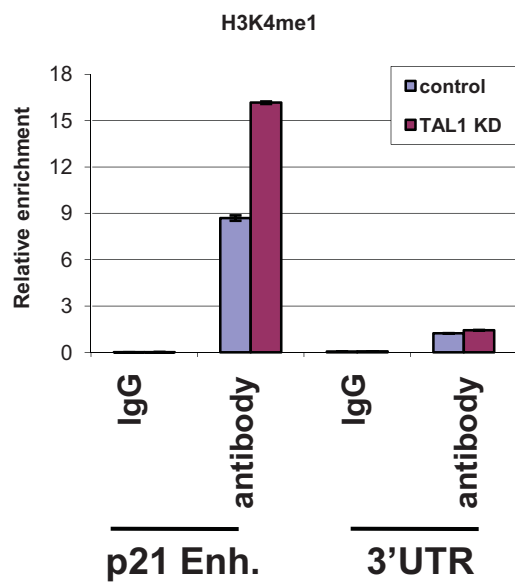

E

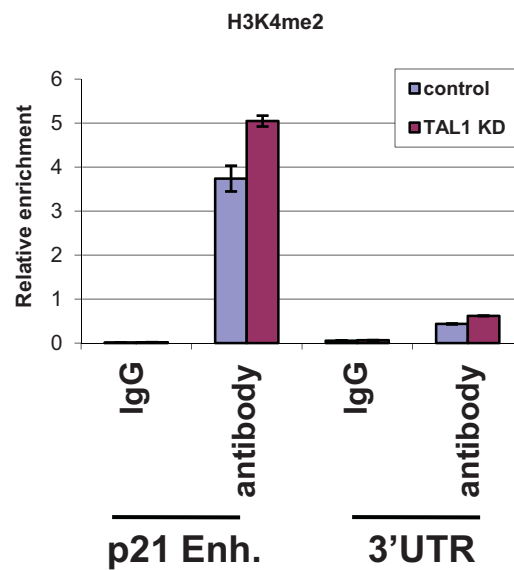

A

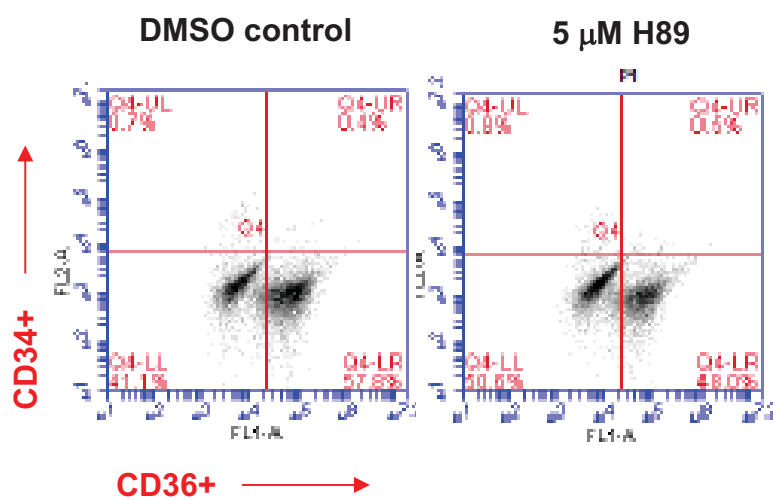

B

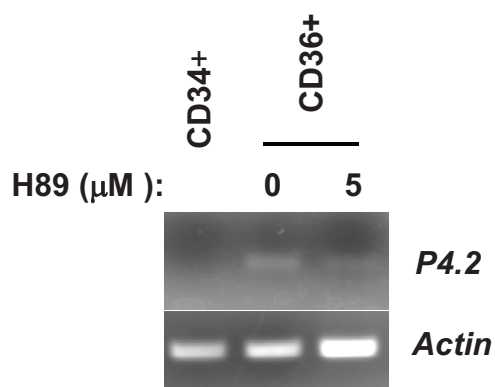

Supplement: NIHMS404443-supplement-Supplementary_Information.pdf [file NIHMS404443-supplement-Supplementary_Information.pdf]
